# Supplementary material
Source: Springer Nature journal article supplement (https://www.springermedizin.de/resource/supplementary/12882_2014_840_MOESM1_ESM.pdf/9454426)

# Labile Blood Pressure during Hemodialysis

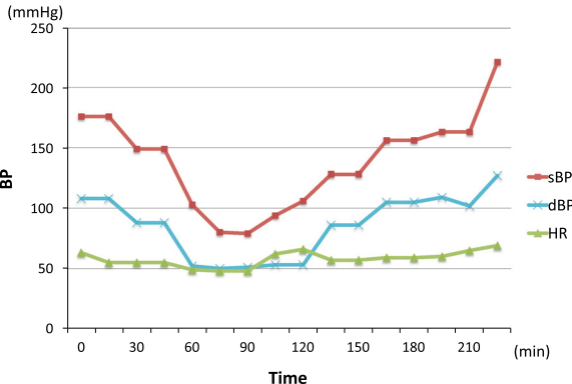

Supplement: MOESM1 [file 9454426]
